# Supplementary material for: Hospital Occupancy and Emergency Department Boarding During the COVID-19 Pandemic
Source: PubMed Central journal article supplement (PMC9526134; doi:10.1001/jamanetworkopen.2022.33964), 2022-09-30
Supplement: jamanetwopen-e2233964-s001.pdf [file jamanetwopen-e2233964-s001.pdf]

## Supplemental Online Content

Janke AT, Melnick ER, Venkatesh AK. Hospital occupancy and emergency department boarding during the COVID-19 pandemic. *JAMA Netw Open*. 2022;5(9):e2233964. doi:10.1001/jamanetworkopen.2022.33964

**eTable.** Sample Site Characteristics from the Epic Peer Benchmarking Service

This supplemental material has been provided by the authors to give readers additional information about their work.

**eTable.** Sample Site Characteristics from the Epic Peer Benchmarking Service

| <b>Hospital Beds</b> | <b>Proportion</b> | <b>Annual ED Visits</b> | <b>Proportion</b> |
|----------------------|-------------------|-------------------------|-------------------|
| <b>&lt;100</b>       | 42%               | <b>0-20,000</b>         | 29%               |
| <b>100-299</b>       | 28%               | <b>20-40,000</b>        | 30%               |
| <b>300-499</b>       | 14%               | <b>40-60,000</b>        | 21%               |
| <b>500-999</b>       | 12%               | <b>60-80,000</b>        | 10%               |
| <b>1000+</b>         | 4%                | <b>80,000+</b>          | 10%               |
